# Supplementary material for: circCD151 promotes GLI2 expression by regulating miR-30d-5p and enhancing proliferation, invasion and stemness of lung cancer
Source: PubMed Central journal article supplement — Mol Med Rep. 2021 Aug 4;24(4):699. doi: 10.3892/mmr.2021.12338 (PMC8365425; doi:10.3892/mmr.2021.12338), 2021-08-04

Figure S1. Detection results of CircCD151 overexpression efficiency. Data are presented as the means  $\pm$  standard deviation. \*\*P<0.01. Circ, circular RNA; NC, negative control.

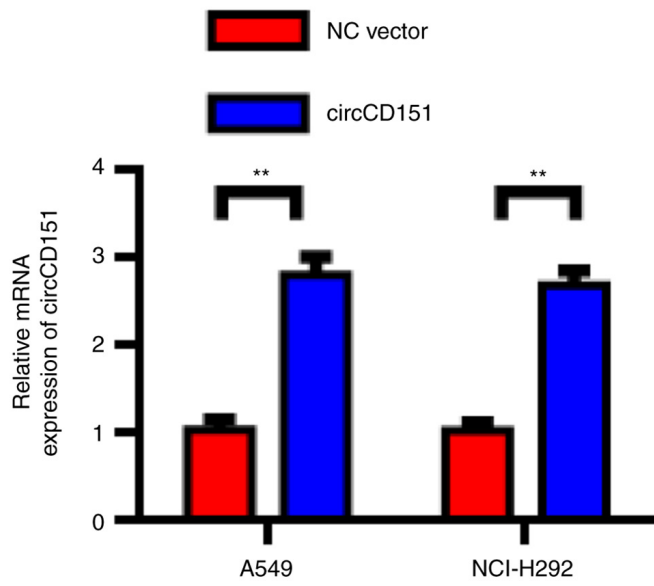

Figure S2. Verification results of siRNA GLI2 knockdown efficiency. Data are presented as the means  $\pm$  standard deviation. \*\*P<0.01. Circ, circular RNA; NC, negative control; si, short interfering.

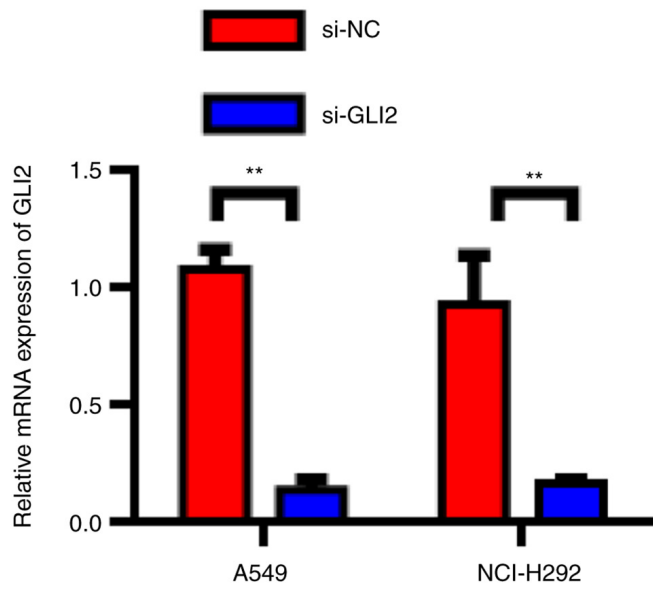

Supplement: Supplementary_Data.pdf [file Supplementary_Data.pdf]
